# Supplementary material for: Detection of Genes in Arabidopsis thaliana L. Responding to DNA Damage from Radiation and Other Stressors in Spaceflight
Source: MDPI journal article supplement (doi:10.3390/genes12060938), 2021-06-19
Supplement: s1 [file s1]

**Supplementary Table S1.** Radiation Metadata for GLDS-7, GLDS-37, and GLDS-38 datasets. GLDS-120 dataset was acquired under similar conditions of GLDS-7.

| Average Absorbed Dose Rate (mGy-day): low-LET (or SAA) | Average Absorbed Dose Rate (mGy-day): high-LET (or GCR) | Cumulative Absorbed Dose (mGy): low-LET (or SAA) | Cumulative Absorbed Dose (mGy): high-LET (or GCR) | Mission      | Accession | Experiment Duration (Days) | Binominal Name       |
|--------------------------------------------------------|---------------------------------------------------------|--------------------------------------------------|---------------------------------------------------|--------------|-----------|----------------------------|----------------------|
| 0.11                                                   | 0.16                                                    | 1.46                                             | 2.02                                              | STS-129      | GLDS-7    | 12                         | Arabidopsis thaliana |
| 0.15                                                   | 0.12                                                    | 1.93                                             | 1.58                                              | STS-129      | GLDS-7    | 12                         | Arabidopsis thaliana |
| 0.11                                                   | 0.15                                                    | 1.23                                             | 1.69                                              | STS-129      | GLDS-7    | 12                         | Arabidopsis thaliana |
| 0.13                                                   | 0.14                                                    | 2                                                | 2.16                                              | STS-129      | GLDS-7    | 14                         | Arabidopsis thaliana |
| 0.07                                                   | 0.13                                                    | 0.58                                             | 1.06                                              | SpaceX CRS-4 | GLDS-37   | 8                          | Arabidopsis thaliana |
| 0.06                                                   | 0.13                                                    | 0.17                                             | 0.38                                              | SpaceX-5     | GLDS-38   | 3                          | Arabidopsis thaliana |
|                                                        | 7 Gy/min                                                |                                                  | 100Gy                                             | NSRL         | GLDS-46   | 5                          | Arabidopsis thaliana |
|                                                        | 2.5 Gy/min                                              |                                                  | 30 Gy                                             | NSRL         | GLDs-46   | 5                          | Arabidopsis thaliana |

**Supplementary Table S2.** Gene names for the ATG numbers for hub genes and authority genes in Figures 2, 3, and 4.

| Figure 2   |           | Figure 3   |           | Figure 4 flavonoid |           | Figure 4 carotenoid |           |
|------------|-----------|------------|-----------|--------------------|-----------|---------------------|-----------|
| ATG number | Gene name | ATG number | Gene name | ATG number         | Gene name | ATG number          | Gene name |
| AT2G45460  | AT2G45460 | AT1G02840  | SR34      | AT1G32640          | MYC2      | AT3G14440           | NCED3     |
| AT5G20850  | RAD51     | AT1G02850  | BGLU11    | AT1G03900          | ATNAP4    | AT1G02335           | GL22      |
| AT5G48720  | XRI1      | AT1G02870  | AT1G02870 | AT1G02850          | BGLU11    | AT1G06720           | AT1G06720 |
| AT1G73540  | NUDT21    | AT1G03110  | TRM82     | AT1G01470          | LEA14     | AT1G06900           | AT1G06900 |
| AT2G31320  | PARP1     | AT1G03230  | AT1G03230 | AT1G01720          | NAC002    | AT1G01470           | LEA14     |
| AT2G30250  | WRKY25    | AT1G03410  | 2A6       | AT1G01800          | AT1G01800 | AT1G01720           | NAC002    |
| AT5G20930  | TOUSLED   | AT1G03860  | PHB2      | AT1G01820          | PEX11C    | AT1G01820           | PEX11C    |
| AT3G53280  | CYP71B5   | AT1G03870  | FLA9      | AT1G02305          | CATHB2    | AT1G02305           | CATHB2    |
|            |           |            |           |                    | EIF2      |                     |           |
| AT5G67360  | SBT1.7    | AT1G03910  | CTN       | AT1G04170          | GAMMA     | AT1G03090           | MCCA      |
| AT5G67460  | AT5G67460 | AT1G04140  | AT1G04140 | AT1G05347          | AT1G05347 | AT1G03220           | AT1G03220 |

|           |           |           |           |           |           |           |           |
|-----------|-----------|-----------|-----------|-----------|-----------|-----------|-----------|
|           |           |           | EIF2      |           |           |           |           |
| AT2G06510 | RPA1A     | AT1G04170 | GAMMA     | AT1G05575 | AT1G05575 | AT1G03610 | AT1G03610 |
| AT5G66130 | RAD17     | AT1G04183 | AT1G04183 | AT1G07135 | AT1G07135 | AT1G03850 | AT1G03850 |
| AT4G02390 | PARP2     | AT1G04190 | TPR3      | AT2G40890 | CYP98A3   | AT1G04440 | CKL13     |
| AT2G18760 | CHR8      | AT1G04270 | RPS15A    | AT1G06640 | AT1G06640 | AT1G05147 | AT1G05147 |
| AT5G65360 | HTR2      | AT1G04340 | AT1G04340 | AT1G02900 | RALF1     | AT1G05347 | AT1G05347 |
| AT5G40840 | SYN2      | AT1G04410 | MDH1      | AT1G02500 | SAM1      | AT1G06570 | HPD       |
| AT4G29170 | MND1      | AT1G04430 | AT1G04430 | AT1G06550 | AT1G06550 | AT1G07135 | AT1G07135 |
| AT5G64060 | anac103   | AT1G04440 | CKL13     | AT1G04870 | PRMT10    | AT1G07140 | RANBP1A   |
| AT4G19130 | AT4G19130 | AT1G04510 | PRP19A    | AT5G13930 | CHS       |           |           |
| AT5G60250 | AT5G60250 | AT1G04680 | AT1G04680 | AT1G06110 | SKIP16    |           |           |
| AT5G55490 | GEX1      | AT1G04690 | KAB1      | AT1G04250 | IAA17     |           |           |
| AT5G52750 | HIPP13    | AT1G04750 | VAMP721   | AT1G06040 | BBX24     |           |           |
| AT5G49480 | ATCP1     | AT1G04820 | TUBA4     | AT5G48930 | HST       |           |           |
| AT5G49110 | AT5G49110 | AT1G04870 | PRMT10    | AT1G01210 | AT1G01210 |           |           |
| AT5G47610 | ATL79     | AT1G04940 | TIC20-I   | AT1G06390 | ASK9      |           |           |
| AT3G27060 | TSO2      | AT1G04980 | PDIL2-2   | AT1G03110 | TRM82     |           |           |
| AT5G46740 | UBP21     | AT1G05260 | PER3      | AT1G04503 | nan       |           |           |
| AT5G07100 | WRKY26    | AT1G05620 | URH2      | AT1G01550 | BPS1      |           |           |
| AT5G43440 | AT5G43440 | AT1G05680 | UGT74E2   | AT1G02335 | GL22      |           |           |
| AT5G24280 | GMI1      | AT1G05850 | CTL1      | AT1G05570 | CALS1     |           |           |
| AT5G18270 | ANAC087   | AT1G05927 | AT1G05927 |           |           |           |           |
| AT5G15380 | DRM1      | AT1G06040 | BBX24     |           |           |           |           |
| AT5G15310 | ATMYB16   | AT1G06110 | SKIP16    |           |           |           |           |
| AT5G12010 | AT5G12010 | AT1G06220 | CLO       |           |           |           |           |
| AT5G11460 | FLZ10     | AT1G06390 | ASK9      |           |           |           |           |
| AT5G03780 | TRFL10    | AT1G06515 | AT1G06515 |           |           |           |           |
| AT5G02760 | AT5G02760 | AT1G06700 | PTI11     |           |           |           |           |
| AT2G38340 | DREB2E    | AT1G07020 | AT1G07020 |           |           |           |           |
| AT5G01970 | AT5G01970 | AT1G07080 | AT1G07080 |           |           |           |           |
| AT3G60420 | AT3G60420 |           |           |           |           |           |           |
| AT3G57550 | AGK2      |           |           |           |           |           |           |
| AT3G51920 | CML9      |           |           |           |           |           |           |
| AT3G47540 | AT3G47540 |           |           |           |           |           |           |
| AT4G21070 | BRCA1     |           |           |           |           |           |           |
| AT3G45730 | AT3G45730 |           |           |           |           |           |           |
| AT4G34510 | KCS17     |           |           |           |           |           |           |
| AT4G33160 | AT4G33160 |           |           |           |           |           |           |
| AT4G31840 | ENODL15   |           |           |           |           |           |           |
| AT4G29780 | AT4G29780 |           |           |           |           |           |           |

|           |           |
|-----------|-----------|
| AT4G28950 | ARAC7     |
| AT4G27652 | AT4G27652 |
| AT4G27654 | AT4G27654 |
| AT4G27280 | KRP1      |
| AT4G25330 | AT4G25330 |
| AT4G25470 | DREB1C    |
| AT4G22610 | AT4G22610 |
| AT4G11740 | PUX8      |
| AT4G05370 | nan       |
| AT4G01450 | AT4G01450 |
| AT2G40610 | EXPA8     |
| AT1G66810 | AT1G66810 |
| AT1G78110 | AT1G78110 |
| AT3G25250 | OXI1      |
| AT3G17250 | AT3G17250 |
| AT3G10500 | NAC053    |
| AT1G69160 | AT1G69160 |
| AT1G27940 | ABCB13    |
| AT1G49050 | APCB1     |
| AT1G31280 | AGO2      |
| AT2G24850 | TAT3      |
| AT1G09180 | ATSAR1    |
| AT1G12020 | AT1G12020 |
| AT1G03440 | AT1G03440 |
| AT1G24150 | ATFH4     |
| AT2G23830 | PVA31     |

**Supplementary Table S3.** Gene names for the ATG numbers for hub genes and authority genes in Figures 5 and 6.

| Figure 5   |           | Figure 6   |           |
|------------|-----------|------------|-----------|
| ATG number | Gene name | ATG number | Gene name |
| AT1G59660  | NUP98B    | AT5G20850  | RAD51     |
| AT1G17360  | AT1G17360 | AT5G40840  | SYN2      |
| AT1G74390  | NEN3      | AT5G02220  | SMR4      |
| AT1G27940  | ABCB13    | AT3G42860  | AT3G42860 |
| AT3G07800  | TK1A      | AT4G35740  | RECQL3    |
| AT3G14560  | AT3G14560 | AT4G29170  | MND1      |
| AT3G25250  | OXI1      | AT4G21070  | BRCA1     |
| AT3G27060  | TSO2      | AT1G13330  | HOP2      |

|           |           |           |           |
|-----------|-----------|-----------|-----------|
| AT3G20490 | AT3G20490 | AT2G31320 | PARP1     |
| AT3G12510 | AT3G12510 | AT2G46610 | RS31A     |
| AT4G02390 | PARP2     | AT2G38340 | DREB2E    |
| AT4G19130 | AT4G19130 | AT2G30250 | WRKY25    |
| AT4G22960 | AT4G22960 | AT5G67460 | AT5G67460 |
| AT4G25330 | AT4G25330 | AT1G09815 | POLD4     |
| AT4G28950 | ARAC7     | AT5G66140 | PAD2      |
| AT4G37490 | CYCB1-1   | AT5G64060 | anac103   |
| AT3G45730 | AT3G45730 | AT2G21790 | RNR1      |
| AT5G03780 | TRFL10    | AT5G55490 | GEX1      |
| AT5G11460 | FLZ10     | AT5G48720 | XRI1      |
| AT5G23910 | AT5G23910 | AT5G48020 | AT5G48020 |
| AT5G24280 | GMI1      | AT5G24280 | GMI1      |
| AT5G48020 | AT5G48020 | AT5G23910 | AT5G23910 |
| AT5G48720 | XRI1      | AT5G11460 | FLZ10     |
| AT5G55490 | GEX1      | AT1G07500 | SMR5      |
| AT5G60250 | AT5G60250 | AT5G03780 | TRFL10    |
| AT5G64060 | anac103   | AT3G45730 | AT3G45730 |
| AT1G13330 | HOP2      | AT4G37490 | CYCB1-1   |
| AT5G66140 | PAD2      | AT4G34510 | KCS17     |
| AT5G67460 | AT5G67460 | AT4G28950 | ARAC7     |
| AT2G21790 | RNR1      | AT4G25330 | AT4G25330 |
| AT1G07500 | SMR5      | AT4G19130 | AT4G19130 |
| AT5G02220 | SMR4      | AT4G02390 | PARP2     |
| AT4G29170 | MND1      | AT1G20350 | TIM17-1   |
| AT4G25580 | AT4G25580 | AT3G12510 | AT3G12510 |
| AT1G09815 | POLD4     | AT3G20490 | AT3G20490 |
| AT2G31320 | PARP1     | AT3G27060 | TSO2      |
| AT4G21070 | BRCA1     | AT3G14560 | AT3G14560 |
| AT4G35740 | RECQL3    | AT3G07800 | TK1A      |
| AT3G42860 | AT3G42860 | AT1G74390 | NEN3      |
| AT5G40840 | SYN2      | AT1G17460 | TRFL3     |
| AT5G66130 | RAD17     | AT1G20180 | AT1G20180 |
| AT5G20850 | RAD51     | AT1G31280 | AGO2      |
| AT2G45460 | AT2G45460 | AT2G18600 | RCE2      |
|           |           | AT2G47680 | AT2G47680 |
